# Supplementary material for: Optimized energy storage performance by a depolarization field in BaMn0.01Ti0.99O3/Na0.5Bi0.5TiO3 multilayer thin films
Source: Royal Society of Chemistry journal article supplement (doi:10.1039/d2tc01796b), 2022-01-01
Supplement: d2tc01796b1.pdf [file d2tc01796b1.pdf]

**Supplementary Materials for**  
**Optimized energy storage performance by depolarization field in**  
**BaMn<sub>0.01</sub>Ti<sub>0.99</sub>O<sub>3</sub>/Na<sub>0.5</sub>Bi<sub>0.5</sub>TiO<sub>3</sub> multilayer thin films**

Caiyu Yue<sup>a,b</sup>, Huajun Sun<sup>a,b,c\*</sup>, Chao Yan<sup>a,b</sup>, Xuehui Huang<sup>b</sup>, Huiting Sui<sup>a,b,c</sup>, Yunlong Hu<sup>a,b</sup>

<sup>a</sup>State Key Laboratory of Silicate Materials for Architectures, Wuhan University of Technology, Wuhan 430070, People's Republic of China;

<sup>b</sup>School of Materials Science and Engineering, Wuhan University of Technology, Wuhan 430070, People's Republic of China;

<sup>c</sup>Advanced Ceramics Institute of Zibo New & High-Tech Industrial Development Zone, Zibo 255000, People's Republic of China;

**This file includes:**

**Fig. S1, Fig. S2**

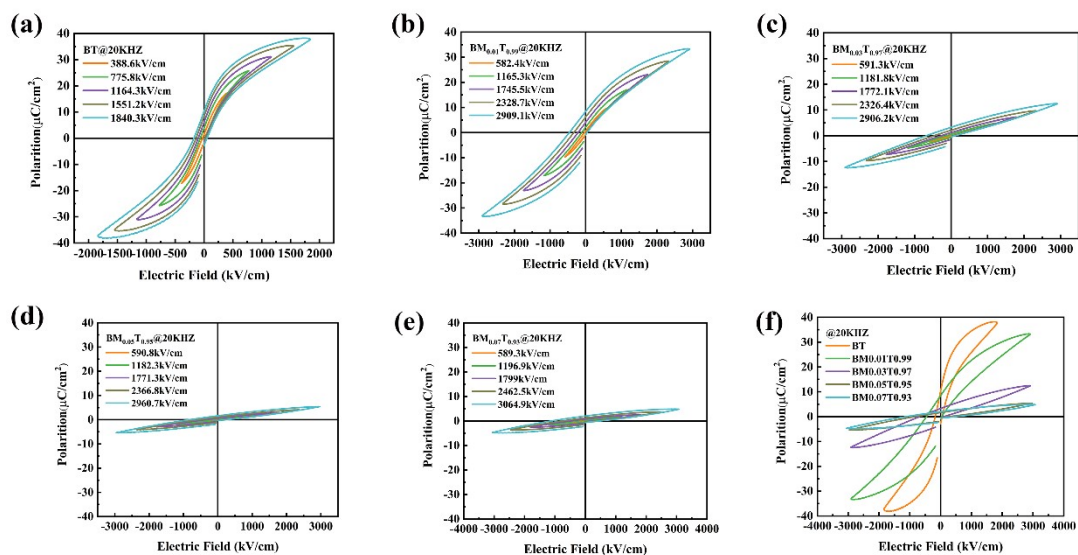

**Fig. S1** Changes of electrical hysteresis loop of BM<sub>x</sub>T(1-x) films.

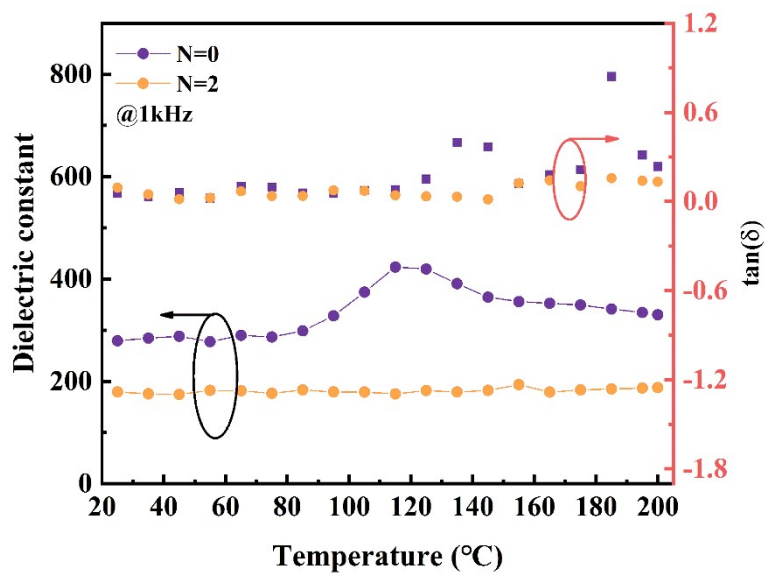

Fig. S2 Temperature dependences of dielectric property for N=0 and N=2.
